# Supplementary material for: How River Rocks Round: Resolving the Shape-Size Paradox
Source: PLoS One. 2014 Feb 12;9(2):e88657. doi: 10.1371/journal.pone.0088657 (PMC3922984; doi:10.1371/journal.pone.0088657)
Supplement: File S1 — An Excel spreadsheet file that contains all data on mass and shape evolution, from drum experiments and numerical simulations, that were used to generate Figure 4 . (XLS) [file pone.0088657.s001.xls]

## Sheet: ReadMe
This xls file contains the raw measurement data and the outcome of the two numerical codes.
Sheets exp_2LA, exp_4LA, exp_8LA, exp_12LA are the experimental results including the major axes (a,b,c) , the volume (V) and the non-abraded surfaces (Am) for each rotation number (rot). Some straightforward calculations (e.g. y1, y2, roundness) are also provided. n2 is the coefficient of the superellipse fitted for the view, n3 is the coefficient of the superellipse fitted to the 3D body itself…
Sheets ch_p10q00, ch_p09q01 and ch_p07q03 contain the results of the chopping algorithm with (q,p)=(1.0,0),(0.9,0.1) and (0.7,0.3), respectively.
Sheets ls_p10q00, ls_p09q01 and ls_p07q03 contain the result of the level-set algorithm with (q,p)=(1.0,0),(0.9,0.1) and (0.7,0.3), respectively.

## Sheet: exp_2LA
	Sample:	2
	Date:	2012-01-05
	Machine:	Los-Angeles
																										BECSÜLT!
	rotation	a	b	A	n2	a	b	c	V	n3	r	roundness	error	y1	y2		Am	Ac	r	Ana	Ana	An	mu	r	g(mu)	At
		[pixel]	[pixel]	[mm2]		[mm]	[mm]	[mm]	[mm3]					c/a	b/a		measured	computed	Ac/Am	measured	[mm2]	[mm2]				[mm2]
1	0	603	526	316520	20	70.15	60.97	50.02	213390	10	5	0.09996	49.208	0.713043	0.869138	1	55107.8	4216.02	0.076505	55107.8	4216.02	21362.1	1.31951	37.0705	1.2213	21090.7
2	0	460	550	252020	19.935	70.15	60.97	50.02	0	0			1949.7	0.713043	0.869138	2	43512.3	3006.21	0.0690887	43512.3	3006.21
3	0	617	441	270800	17.858	70.15	60.97	50.02	0	0			3060	0.713043	0.869138	3	47855.5	3458.84	0.0722766	47855.5	3458.84
51	50	592	520	295950	5.7868	70.15	60.97	50.02	186650	5.1501	17	0.339864	103.12	0.713043	0.869138	1	50916.4	4074.53	0.0800238	30819.9	2466.32	10946.6	1.23613	35.4525	1.07183	16928.9
52	50	448	538	228470	4.8771	70.15	60.97	50.02	0	0			1829.4	0.713043	0.869138	2	39688.8	2905.31	0.0732023	20897.5	1529.75
53	50	604	429	246410	5.0495	70.15	60.97	50.02	0	0			2136.5	0.713043	0.869138	3	42863.6	3342.76	0.0779859	18942	1477.21
101	100	596	512	269520	2.9989	70.15	60.97	50.02	161930	3.3849	26.9	0.537785	65.362	0.713043	0.869138	1	46546.2	3865.89	0.0830548	19493.6	1619.03	5730.32	1.15234	33.8127	0.931457	13382.3
102	100	444	533	216210	3.6142	70.15	60.97	50.02	0	0			1847.2	0.713043	0.869138	2	37568.8	2756.55	0.0733732	5916.76	434.131
103	100	598	429	237200	3.9225	70.15	60.97	50.02	0	0			2217	0.713043	0.869138	3	40838.8	3171.59	0.0776611	10455.6	811.996
151	150	575	492	244410	2.7196	70.15	60.97	50.02	137200	2.5406	36.385	0.727409	68.119	0.713043	0.869138	1	42715.9	3631.08	0.0850054		0	166.483	1.07653	31.9955	0.812931	10457.8
152	150	433	502	193680	3.1322	70.15	60.97	50.02	0	0			1587.4	0.713043	0.869138	2	33900.4	2589.12	0.0763742	1089.92	83.2415
153	150	587	423	213090	2.648	70.15	60.97	50.02	0	0			1885.8	0.713043	0.869138	3	37452.4	2978.95	0.0795396		0
201	200	536	479	215150	2.4255	63.52	58.36	49.94	115780	2.4549	38.205	0.765018	56.067	0.786209	0.918766	1
202	200	430	495	179060	2.4581	63.52	58.36	49.94	0	0			834.49	0.786209	0.918766	2
203	200	537	421	193950	2.644	63.52	58.36	49.94	0	0			1071.6	0.786209	0.918766	3
251	250	494	444	185610	2.5109	61.24	54.77	49.9	96964	2.2307	42.12	0.844088	113.43	0.814827	0.89435	1
252	250	420	454	159550	2.4131	61.24	54.77	49.9	0	0			553.63	0.814827	0.89435	2
253	250	508	418	177130	2.388	61.24	54.77	49.9	0	0			467.13	0.814827	0.89435	3
331	330	431	402	147750	2.5831	51.44	49.81	49.01	71018	2.1701	43.707	0.891798	69.751	0.95276	0.968313	1
332	330	414	408	135140	2.1019	51.44	49.81	49.01	0	0			68.922	0.95276	0.968313	2
333	330	441	415	140800	1.8996	51.44	49.81	49.01	0	0			110.98	0.95276	0.968313	3
351	350	423	405	140130	2.2422	48.11	47.18	48.04	65534	2.3319	40.507	0.843193	16.149	0.998545	0.980669	1
352	350	397	401	128570	2.1589	48.11	47.18	48.04	0	0			58.198	0.998545	0.980669	2
353	350	421	396	131710	2.0313	48.11	47.18	48.04	0	0			76.157	0.998545	0.980669	3
401	400	393	376	121080	2.2545	47.95	44.83	43.63	54341	2.231		0.95	18.394	0.909906	0.934932	1
402	400	353	379	107250	2.1137	47.95	44.83	43.63	0	0			77.02	0.909906	0.934932	2
403	400	396	358	117390	2.3301	47.95	44.83	43.63	0	0			92.809	0.909906	0.934932	3
451	450	358	331	93131	2.0036	45.62	40.24	40.23	44347	2.3294			103.45	0.88185	0.882069	1
452	450	333	340	90935	2.1248	45.62	40.24	40.23	0	0			117.04	0.88185	0.882069	2
453	450	349	327	91498	2.1142	45.62	40.24	40.23	0	0			83.541	0.88185	0.882069	3
501	500	331	307	82830	2.2185	41.61	39.46	38.89	37389	2.2589			19.078	0.934631	0.94833	1
502	500	293	313	75165	2.256	41.61	39.46	38.89	0	0			63.336	0.934631	0.94833	2
503	500	335	290	77633	2.0949	41.61	39.46	38.89	0	0			88.226	0.934631	0.94833	3
551	550	318	314	77561	1.9448	40.47	36.01	37.58	30693	2.1423			26.446	0.928589	0.889795	1
552	550	276	296	67205	2.2821	40.47	36.01	37.58	0	0			65.533	0.928589	0.889795	2
553	550	300	291	69410	2.066	40.47	36.01	37.58	0	0			10.133	0.928589	0.889795	3

## Sheet: exp_4LA
	Sample:	4
	Date:	2012-01-06
	Machine:	Los-Angeles
																										BECSÜLT!
	rotation	a	b	A	n2	a	b	c	V	n3	r	roundness	error	y1	y2		Am	Ac	r	Ana	Ana	An	mu	r	g(mu)	At
		[pixel]	[pixel]	[mm2]		[mm]	[mm]	[mm]	[mm3]					c/a	b/a		measured	computed	Ac/Am	measured	[mm2]	[mm2]				[mm2]
1	0	619	528	326420	-1	70.92	60.53	51.5	221260	10	5	0.0970874	81.785	0.72617	0.853497	1	56564.3	4231.54	0.0748094	56564.3	4231.54	21809.2	1.31951	37.5207	1.2213	21606.1
2	0	475	556	263400	24.205	70.92	60.53	51.5	0	0			1513.8	0.72617	0.853497	2	45853.1	3072.82	0.0670144	45853.1	3072.82
3	0	633	461	290810	21.189	70.92	60.53	51.5	0	0			1964.2	0.72617	0.853497	3	50463.9	3600.27	0.0713435	50463.9	3600.27
26	25	611	526	315330	8.6137	70.92	60.53	51.5	206280	7.5506	11.61	0.225437	60.045	0.72617	0.853497	1	54754.9	4190.04	0.0765236	40854	3126.3	15611	1.29017	36.6541	1.1676	19712.8
27	25	465	551	249370	7.1092	70.92	60.53	51.5	0	0			1662.7	0.72617	0.853497	2	43538.7	3042.68	0.0698845	27498.8	1921.74
28	25	632	455	273990	5.1625	70.92	60.53	51.5	0	0			2037.4	0.72617	0.853497	3	47581.6	3564.96	0.0749231	36803.6	2757.44
51	50	604	524	302490	5.3545	70.92	60.53	51.5	193040	5.1676	17.34	0.336699	30.296	0.72617	0.853497	1	52528.6	4090.72	0.0778761	37525.2	2922.32	13320.5	1.23669	35.8525	1.07281	17328.9
52	50	460	545	241530	5.9646	70.92	60.53	51.5	0	0			1746.3	0.72617	0.853497	2	41920.4	2970.56	0.0708619	16632	1178.58
53	50	618	454	261880	4.2221	70.92	60.53	51.5	0	0			1900.8	0.72617	0.853497	3	45292.6	3480.46	0.0768439	33305.7	2559.34
76	75	608	523	293450	3.8693	70.92	60.53	51.5	180420	4.0841	22.43	0.435534	70.368	0.72617	0.853497	1	51642.2	3990.33	0.0772688	24811.8	1917.18	8990.92	1.19346	35.0536	0.999111	15427.2
77	75	459	546	234100	4.2496	70.92	60.53	51.5	0	0			1793.8	0.72617	0.853497	2	41010.7	2897.66	0.0706562	11581.1	818.273
78	75	613	449	251860	3.6513	70.92	60.53	51.5	0	0			1801.8	0.72617	0.853497	3	44486.3	3395.05	0.0763166	23061.9	1760.01
101	100	601	520	279380	3.1856	70.92	60.53	51.5	164280	3.2559	28.76	0.558447	95.835	0.72617	0.853497	1	49413.6	3853.32	0.0779811	20434.9	1593.54	7953.33	1.14303	33.9755	0.916465	13294
102	100	455	539	226760	3.9229	70.92	60.53	51.5	0	0			1908.1	0.72617	0.853497	2	39740.4	2798.17	0.0704111	13648.8	961.026
103	100	609	450	241230	2.9514	70.92	60.53	51.5	0	0			1698.2	0.72617	0.853497	3	42253.1	3278.48	0.0775913	18328.1	1422.1
126	125	594	515	270350	3.0075	70.92	60.53	51.5	153320	2.8657	33.106	0.642835	66.719	0.72617	0.853497	1	47761.8	3754.43	0.0786073	20957.4	1647.41	5787.42	1.11037	33.2024	0.864843	11980.8
127	125	452	537	216100	3.1191	70.92	60.53	51.5	0	0			1698.7	0.72617	0.853497	2	37820.1	2726.35	0.0720875	5701.07	410.975
128	125	604	447	231830	2.6535	70.92	60.53	51.5	0	0			1642.9	0.72617	0.853497	3	40751.5	3194.33	0.0783857	10656.7	835.331
151	150	591	515	258580	2.5472	70.92	60.53	51.5	142740	2.5653	37.295	0.724175	61.114	0.72617	0.853497	1	44903.9	3653.92	0.081372	8624.16	701.765	2452.76	1.07936	32.4204	0.817213	10794
152	150	451	527	208580	2.9103	70.92	60.53	51.5	0	0			1619.8	0.72617	0.853497	2	36354.9	2653.37	0.0729851
153	150	600	445	225870	2.5081	70.92	60.53	51.5	0	0			1595.1	0.72617	0.853497	3	39760.4	3108.82	0.0781888	6709.6	524.616
176	175	577	508	243330	2.3499	69	60.53	51.5	132940	2.4165	39.575	0.768447	36.053	0.746377	0.877246	1	42543	3496.24	0.0821814	8821.57	724.968	2379.85	1.06155	31.6608	0.790467	9957.23
177	175	449	528	203590	2.6546	69	60.53	51.5	0	0			1417.2	0.746377	0.877246	2	35546	2609.51	0.0734123
178	175	583	442	216010	2.428	69	60.53	51.5	0	0			1435.1	0.746377	0.877246	3	38379.1	2974.66	0.0775074	5998.88	464.957
201	200	574	503	229730	2.0702	68.28	60.53	51.5	122810	2.2206	42.187	0.819165	46.027	0.754247	0.886497	1	40572.9	3369.96	0.0830594			409.636	1.03503	30.8353	0.751457	8978.65
202	200	455	526	196860	2.2815	68.28	60.53	51.5	0	0			1194	0.754247	0.886497	2	34204.8	2541.79	0.0743109
203	200	582	442	214590	2.388	68.28	60.53	51.5	0	0			1439	0.754247	0.886497	3	37472.5	2867.23	0.0765154	2676.82	204.818
226	225	560	461	210520	2.2212	67.17	59.75	51.5	114770	2.1265	42.928	0.833553	80.8	0.766711	0.889534	1
227	225	449	522	188330	2.1276	67.17	59.75	51.5	0	0			998.74	0.766711	0.889534	2
228	225	567	447	208730	2.2904	67.17	59.75	51.5	0	0			1181.1	0.766711	0.889534	3
251	250	554	464	202270	2.0098	65.62	55.01	51.5	105680	2.1828	43.615	0.846893	63.946	0.784822	0.838311	1
252	250	447	475	175580	2.3203	65.62	55.01	51.5	0	0			616.71	0.784822	0.838311	2
253	250	560	437	200830	2.265	65.62	55.01	51.5	0	0			721.47	0.784822	0.838311	3
276	275	490	449	187630	2.5844	58.45	53.04	51.45	94535	2.2921	46.52	0.904179	69.366	0.88024	0.907442	1
277	275	438	461	166960	2.3196	58.45	53.04	51.45	0	0			240.37	0.88024	0.907442	2
278	275	515	438	183270	2.1971	58.45	53.04	51.45	0	0			371.69	0.88024	0.907442	3
301	300	481	437	176950	2.4641	57.05	52.65	51.12	87364	2.185	46.55	0.910603	81.661	0.896056	0.922875	1
302	300	440	455	159530	2.0786	57.05	52.65	51.12	0	0			170.25	0.896056	0.922875	2
303	300	500	432	172520	2.092	57.05	52.65	51.12	0	0			234.15	0.896056	0.922875	3
326	325	459	449	164770	2.0978	53.44	51.2	51	77970	2.1411	46.99	0.921373	35.519	0.954341	0.958084	1
327	325	431	433	147080	2.0183	53.44	51.2	51	0	0			48.428	0.954341	0.958084	2
328	325	457	428	158360	2.1744	53.44	51.2	51	0	0			84.646	0.954341	0.958084	3
351	350	445	423	154040	2.2455	52.85	51.13	50.85	70993	1.974	46.83	0.920944	84.766	0.962157	0.967455	1
352	350	415	429	137700	1.9242	52.85	51.13	50.85	0	0			58.273	0.962157	0.967455	2
353	350	445	415	148630	2.1372	52.85	51.13	50.85	0	0			86.998	0.962157	0.967455	3
376	375	411	413	141140	2.3623	49.69	50.14	46.66	64685	2.1313	42.98	0.921132	65.016	0.939022	1.00906	1
377	375	384	415	129340	2.1902	49.69	50.14	46.66	0	0			100.26	0.939022	1.00906	2
378	375	432	375	132840	2.2596	49.69	50.14	46.66	0	0			171.95	0.939022	1.00906	3
401	400	409	404	135280	2.2484	48.18	49.27	44.04	58776	2.1558		0.92	58.19	0.914072	1.02262	1
402	400	374	413	126290	2.2393	48.18	49.27	44.04	0	0			269.6	0.914072	1.02262	2
403	400	416	374	128350	2.3024	48.18	49.27	44.04	0	0			211.56	0.914072	1.02262	3
451	450	397	356	119770	2.5243	46.16	45.06	43.21	48282	2.053			270.49	0.936092	0.97617	1
452	450	360	378	110230	2.1775	46.16	45.06	43.21	0	0			87.253	0.936092	0.97617	2
453	450	404	358	112880	1.9679	46.16	45.06	43.21	0	0			235.63	0.936092	0.97617	3
501	500	359	348	107980	2.7247	43.38	42.15	40.54	41074	2.1216			215.12	0.934532	0.971646	1
502	500	335	351	97499	2.3408	43.38	42.15	40.54	0	0			62.604	0.934532	0.971646	2
503	500	372	355	99706	1.8184	43.38	42.15	40.54	0	0			70.139	0.934532	0.971646	3
551	550	321	314	87405	2.7622	39.64	38.04	36.92	34297	2.4063			49.495	0.931382	0.959637	1
552	550	325	340	86117	1.9609	39.64	38.04	36.92	0	0			78.742	0.931382	0.959637	2
553	550	340	322	86734	2.0462	39.64	38.04	36.92	0	0			75.601	0.931382	0.959637	3
601	600	312	309	79560	2.3051	36.81	36.92	36.63	28745	2.2226			36.108	0.99511	1.00299	1
602	600	308	328	79955	2.0407	36.81	36.92	36.63	0	0			21.341	0.99511	1.00299	2
603	600	317	298	74549	2.0252	36.81	36.92	36.63	0	0			40.568	0.99511	1.00299	3

## Sheet: exp_8LA
	Sample:	8		Remark: After 500 rotations the sample cracked
	Date:	2012-03-14
	Machine:	Los-Angeles
																										BECSÜLT!
	rotation	a	b	A	n2	a	b	c	V	n3	r	roundness	error	y1	y2		Am	Ac	r	Ana	Ana	An	mu	r	g(mu)	At
		[pixel]	[pixel]	[mm2]		[mm]	[mm]	[mm]	[mm3]					c/a	b/a		measured	computed	Ac/Am	measured	[mm2]	[mm2]				[mm2]
1	0	608	521	316690	20	71.54	61.18	49.37	220170	10	5	0.101276		0.690103	0.855186	1	56067	4360.07	0.0777653	56067	4360.07	21637.9	1.31951	37.459	1.2213	21535.1
2	0	447	556	247490	19.088	71.54	61.18	49.37	0	0				0.690103	0.855186	2	43732.4	2977.36	0.0680813	43732.4	2977.36
3	0	629	439	275140	20.739	71.54	61.18	49.37	0	0				0.690103	0.855186	3	48140.5	3481.54	0.0723204	48140.5	3481.54
26	25	610	513	302030	6.1328	71.54	61.18	49.37	203810	8.2952	10	0.202552		0.690103	0.855186	1	53282.6	4288.6	0.0804877	45015.5	3623.2	16917.1	1.30084	36.5072	1.187	19880.1
27	25	432	544	228360	6.8875	71.54	61.18	49.37	0	0				0.690103	0.855186	2	41015.4	2959.58	0.0721577	31037.6	2239.6
28	25	622	434	258400	5.4596	71.54	61.18	49.37	0	0				0.690103	0.855186	3	45642	3460.74	0.0758236	34234.1	2595.75
51	50	607	514	295310	4.8011	71.54	61.18	49.37	191560	5.5311	15.69	0.317804		0.690103	0.855186	1	51912	4193.92	0.080789	31670.7	2558.64	12545.8	1.24764	35.7607	1.09189	17546.9
52	50	419	536	210610	4.3963	71.54	61.18	49.37	0	0				0.690103	0.855186	2	39269.7	2894.24	0.0737015	23898.4	1761.34
53	50	614	428	244970	4.1778	71.54	61.18	49.37	0	0				0.690103	0.855186	3	43772.7	3384.34	0.0773162	25259	1952.93
76	75	601	513	279010	3.4088	71.54	61.18	49.37	176640	4.1044	21.65	0.438525		0.690103	0.855186	1	49416	4071	0.0823823	28952.4	2385.16	8902.58	1.19446	34.807	1.00079	15236.5
77	75	421	536	212250	4.5171	71.54	61.18	49.37	0	0				0.690103	0.855186	2	37747.2	2809.41	0.0744272	13806.5	1027.58
78	75	611	426	238970	3.733	71.54	61.18	49.37	0	0				0.690103	0.855186	3	42136.8	3285.15	0.0779638	13320.9	1038.55
101	100	599	512	271150	3.0132	71.54	61.18	49.37	165790	3.488	25.75	0.521572		0.690103	0.855186	1	47733.6	3976.15	0.0832987	26414.1	2200.26	8670.99	1.15934	34.0792	0.942802	13759.7
102	100	424	536	209800	3.8789	71.54	61.18	49.37	0	0				0.690103	0.855186	2	36901.2	2743.96	0.0743595	12007.7	892.888
103	100	607	423	231100	3.3048	71.54	61.18	49.37	0	0				0.690103	0.855186	3	40995.9	3208.61	0.0782666	15873.2	1242.34
126	125	593	508	263690	2.8771	71.54	61.18	49.37	151880	2.9326	31.06	0.629127		0.690103	0.855186	1	46662.1	3847.46	0.0824537	24626.5	2030.54	7989.66	1.11652	33.0982	0.87444	12037.8
127	125	379	525	180730	3.4855	71.54	61.18	49.37	0	0				0.690103	0.855186	2	35660.3	2655.15	0.0744568	7901.84	588.346
128	125	604	422	221190	2.7708	71.54	61.18	49.37	0	0				0.690103	0.855186	3	39459.4	3104.76	0.0786824	17487.2	1375.94
151	150	589	502	254140	2.6641	71.54	61.18	49.37	142140	2.6364	34.45	0.697792		0.690103	0.855186	1	45249.8	3752.12	0.0829201	19682.6	1632.08	6141.25	1.08726	32.375	0.829211	10921.8
152	150	390	524	181630	3.0919	71.54	61.18	49.37	0	0				0.690103	0.855186	2	34586.5	2589.35	0.0748659	7033.33	526.557
153	150	601	423	213380	2.4389	71.54	61.18	49.37	0	0				0.690103	0.855186	3	37999.8	3027.82	0.0796799	11445.7	911.989
176	175	570	505	241280	2.4275	68.29	59.36	49.37	131100	2.62	34.93	0.707515		0.722946	0.869234	1	42464.5	3469.55	0.0817048	17427.9	1423.94	2847.89	1.08547	31.5141	0.826486	10314.7
177	175	421	524	189120	2.6369	68.29	59.36	49.37	0	0				0.722946	0.869234	2	33306.8	2508.3	0.0753089
178	175	572	417	198900	2.3852	68.29	59.36	49.37	0	0				0.722946	0.869234	3	35384.5	2885.64	0.081551
201	200	562	503	231410	2.2475	67.54	59.36	49.37	123210	2.4394	37.43	0.758153		0.730974	0.878887	1
202	200	420	497	181710	2.8075	67.54	59.36	49.37	0	0				0.730974	0.878887	2
203	200	572	419	195200	2.213	67.54	59.36	49.37	0	0				0.730974	0.878887	3
226	225	512	451	196820	2.5787	65.26	57.0501	49.37	113520	2.4142	38.147	0.772676		0.756512	0.874197	1
227	225	490	415	173680	2.5987	65.26	57.05	49.37	0	0				0.756512	0.874196	2
228	225	549	417	188880	2.3032	65.26	57.05	49.37	0	0				0.756512	0.874196	3
251	250	521	465	200130	2.3127	62.47	56.66	49.37	104300	2.3121	40.07	0.811626		0.790299	0.906995	1
252	250	410	482	159980	2.1738	62.47	56.66	49.37	0	0				0.790299	0.906995	2
253	250	522	417	177940	2.238	62.47	56.66	49.37	0	0				0.790299	0.906995	3
276	275	504	469	189460	2.1124	61.35	56.46	49.37	96708	2.17	42.206	0.854892		0.804727	0.920293	1
277	275	416	479	164330	2.3001	61.35	56.46	49.37	0	0				0.804727	0.920293	2
278	275	497	415	168560	2.236	61.35	56.46	49.37	0	0				0.804727	0.920293	3
301	300	486	458	176720	2.0579	59.26	56.24	49.37	87895	2.041	44.66	0.904598		0.833108	0.949038	1
302	300	408	469	150490	2.007	59.26	56.24	49.37	0	0				0.833108	0.949038	2
303	300	473	411	159400	2.2587	59.26	56.24	49.37	0	0				0.833108	0.949038	3
326	325	464	455	163410	1.9279	55.36	55.39	47.84	78576	2.0468	43.097	0.900857		0.864162	1.00054	1
327	325	412	456	145890	1.9435	55.36	55.39	47.84	0	0				0.864162	1.00054	2
328	325	482	414	152130	1.8592	55.36	55.39	47.84	0	0				0.864162	1.00054	3
351	350	458	430	157080	2.0841	54.03	53.06	45.05	71686	2.1031	41.36	0.918091		0.833796	0.982047	1
352	350	389	436	135050	2.0745	54.03	53.06	45.05	0	0				0.833796	0.982047	2
353	350	459	391	138660	1.9194	54.03	53.06	45.05	0	0				0.833796	0.982047	3
376	375	452	411	147520	2.0592	52.07	49.92	44.53	65615	2.1759	39.788	0.89351		0.855195	0.958709	1
377	375	379	412	128250	2.2707	52.07	49.92	44.53	0	0				0.855195	0.958709	2
378	375	448	377	133570	2.0365	52.07	49.92	44.53	0	0				0.855195	0.958709	3
401	400	433	383	132770	2.1055	49.29	46.88	42.37	59444	2.3616		0.95		0.859606	0.951106	1
402	400	367	415	121810	2.0999	49.29	46.88	42.37	0	0				0.859606	0.951106	2
403	400	400	372	119740	2.1362	49.29	46.88	42.37	0	0				0.859606	0.951106	3
451	450	396	371	118030	2.1263	46.92	45.59	37.26	49444	2.4284				0.794118	0.971654	1
452	450	354	376	106660	2.1109	46.92	45.59	37.26	0	0				0.794118	0.971654	2
453	450	375	351	96162	1.6946	46.92	45.59	37.26	0	0				0.794118	0.971654	3
501	500	370	349	100420	1.9504	41.35	43.02	35.26	41149	2.6258				0.852721	1.04039	1
502	500	328	318	91114	2.8507	41.35	43.02	35.26	0	0				0.852721	1.04039	2
503	500	371	324	95097	2.0385	41.35	43.02	35.26	0	0				0.852721	1.04039	3

## Sheet: exp_12LA
	Sample:	12
	Date:	2012-03-08
	Machine:	Los-Angeles
	rotation	a	b	A	n2	a	b	c	V	n3	r	roundness	error	y1	y2		Am	Ac	r	Ana	Ana	An	mu	r	g(mu)	At
		[pixel]	[pixel]	[mm2]		[mm]	[mm]	[mm]	[mm3]					c/a	b/a		measured	computed	Ac/Am	measured	[mm2]	[mm2]				[mm2]
1	0	614	522	319190	19.342	70.52	60.1	51.62	218390	10	5	0.0968617	10.561	0.731991	0.85224	1	55458.2	4177.78	0.0753321	55458.2	4177.78	21648.4	1.31951	37.3578	1.2213	21418.8
2	0	78	8	706	-1	70.52	60.1	51.62	0	0			214.17	0.731991	0.85224	2	43888.5	3058.1	0.0696787	43888.5	3058.1
3	0	37	67	1816.5	1.705	70.52	60.1	51.62	0	0			8.195	0.731991	0.85224	3	48101.2	3588.3	0.074599	48101.2	3588.3
26	25	606	518	297910	4.938	70.52	60.1	51.62	200420	6.6239	13.32	0.25804	344.09	0.731991	0.85224	1	52148.9	4109.72	0.0788074	38457	3030.7	14078.3	1.27371	36.3037	1.13799	18847.3
27	25	133	11	1351	3.8874	70.52	60.1	51.62	0	0			525.16	0.731991	0.85224	2	40980.7	3008.27	0.0734071	23502	1725.22
28	25	609	446	261320	5.8477	70.52	60.1	51.62	0	0			1598.6	0.731991	0.85224	3	45541.2	3529.84	0.0775087	29457.7	2283.23
51	50	597	515	283110	3.8094	70.52	60.1	51.62	185020	4.5718	19.82	0.38396	267	0.731991	0.85224	1	49012.7	3991.7	0.0814422	34455.8	2806.16	11496.7	1.21526	35.349	1.03595	16266.8
52	50	523	456	230210	6.1432	70.52	60.1	51.62	0	0			397.83	0.731991	0.85224	2	38762.4	2921.89	0.0753795	15585.5	1174.82
53	50	598	444	248400	4.3053	70.52	60.1	51.62	0	0			1688.7	0.731991	0.85224	3	42817.9	3428.48	0.0800712	22072.2	1767.35
76	75	584	510	267960	3.2973	70.52	60.1	51.62	169910	3.5871	25.45	0.493026	203.35	0.731991	0.85224	1	46525.8	3867.69	0.08313	21513.5	1788.41	7604.62	1.16572	34.3592	0.953211	14141.2
77	75	134	6	817	-1	70.52	60.1	51.62	0	0			456.3	0.731991	0.85224	2	37867.4	2831.11	0.0747638	10623.3	794.238
78	75	592	441	237010	3.4744	70.52	60.1	51.62	0	0			1633.1	0.731991	0.85224	3	40771.3	3321.97	0.081478	14969.1	1219.66
101	100	582	509	261070	2.9676	70.52	60.1	51.62	159340	3.1291	30.137	0.583824	122.29	0.731991	0.85224	1	45402.4	3775.8	0.083163	17084.9	1420.83	5959.22	1.13321	33.6314	0.900788	12803.3
102	100	445	516	203690	3.0629	70.52	60.1	51.62	0	0			1362.6	0.731991	0.85224	2	36618.1	2763.85	0.0754777	7991.69	603.195
103	100	589	438	230000	3.1407	70.52	60.1	51.62	0	0			1541.6	0.731991	0.85224	3	40103.2	3243.04	0.0808673	11816.7	955.584
126	125	581	507	253760	2.6882	70.52	60.1	51.62	149250	2.7887	34.212	0.662766	113.83	0.731991	0.85224	1	43533.1	3683.63	0.0846168	12248.1	1036.4	4606.43	1.10298	32.906	0.853368	11611.7
127	125	520	446	204000	2.9416	70.52	60.1	51.62	0	0			296.69	0.731991	0.85224	2	34902.6	2696.39	0.0772546	5980.04	461.986
128	125	591	435	224730	2.8596	70.52	60.1	51.62	0	0			1621.3	0.731991	0.85224	3	39169.8	3163.88	0.0807734	9964.06	804.831
151	150	577	503	244780	2.4806	70.52	60.1	51.62	140680	2.5504	37.568	0.72778	87.361	0.731991	0.85224	1	42213.7	3601.88	0.0853249	11640.5	993.223	3929.49	1.07766	32.2637	0.814637	10656.2
152	150	440	513	186140	2.2998	70.52	60.1	51.62	0	0			1094.4	0.731991	0.85224	2	33928.9	2636.55	0.0777079	5267.76	409.346
153	150	587	435	217750	2.5835	70.52	60.1	51.62	0	0			1447.3	0.731991	0.85224	3	37087.3	3093.66	0.0834156	6739.45	562.176
176	175	557	502	233860	2.4094	66.78	60.1	51.62	130470	2.4779	39.568	0.766525	257.07	0.772986	0.89997	1	40545.1	3383.93	0.0834609	7953.82	663.833	3153.76	1.06913	31.4635	0.801784	9974.29
177	175	121	6	678	4.2417	66.78	60.1	51.62	0	0			350.06	0.772986	0.89997	2	32242	2615.73	0.0811282	5233.86	424.614
178	175	2288	998	2266100	13.998	66.78	60.1	51.62	0	0			6943,01,01	0.772986	0.89997	3	36281.7	2906.47	0.0801085	6097.12	488.431
201	200	542	500	221800	2.2461	65.92	60.1	51.62	120940	2.286	42.094	0.815459	100.51	0.78307	0.911711	1	38522.1	3260.9	0.0846501	8134.05	688.548	2326.05	1.04431	30.678	0.764999	9047.43
202	200	513	438	185910	2.3243	65.92	60.1	51.62	0	0			89.624	0.78307	0.911711	2	32286.8	2553.52	0.0790886	2208.09	174.635
203	200	554	438	206530	2.5651	65.92	60.1	51.62	0	0			1232.3	0.78307	0.911711	3	34866.7	2800.79	0.0803285	3732.72	299.844
226	225	550	500	212900	1.9288	64.65	58.2	51.62	110390	2.1824	44.158	0.855444	177.96	0.798453	0.900232	1
227	225	500	509	193980	1.8582	64.65	58.2	51.62	0	0			583.35	0.798453	0.900232	2
228	225	540	431	195080	2.4274	64.65	58.2	51.62	0	0			960.91	0.798453	0.900232	3
251	250	135	8	836.5	1.9311	62.35	56.42	51.62	103300	2.1847	45.065	0.873014	418.66	0.827907	0.904892	1
252	250	481	424	166350	2.223	62.35	56.42	51.62	0	0			51.351	0.827907	0.904892	2
253	250	16	20	208.5	1.3845	62.35	56.42	51.62	0	0			12.526	0.827907	0.904892	3
276	275	483	438	161500	-1	59.75	54.5	51.62	93873	2.1398	45.99	0.890934	104	0.863933	0.912134	1
277	275	28	19	416.5	1.9838	59.75	54.5	51.62	0	0			1.7568	0.863933	0.912134	2
278	275	521	424	176350	2.0892	59.75	54.5	51.62	0	0			540.71	0.863933	0.912134	3
301	300	481	433	167440	2.1305	56.26	53.02	51.62	87695	2.1875	45.81	0.887447	157.58	0.917526	0.94241	1
302	300	424	454	156590	2.2052	56.26	53.02	51.62	0	0			475.09	0.917526	0.94241	2
303	300	479	417	164760	2.3016	56.26	53.02	51.62	0	0			387.52	0.917526	0.94241	3
326	325	445	426	158540	2.4089	53.21	52.7	49.17	80044	2.2361	43.65	0.887736	253.72	0.924074	0.990415	1
327	325	419	450	146590	1.9492	53.21	52.7	49.17	0	0			197.38	0.924074	0.990415	2
328	325	446	414	150090	2.12	53.21	52.7	49.17	0	0			203.13	0.924074	0.990415	3
351	350	431	414	147220	2.3034	51.22	50.74	48.06	73161	2.2598	44.04	0.916355	34.151	0.938305	0.990629	1
352	350	397	437	136410	2.0058	51.22	50.74	48.06	0	0			158.86	0.938305	0.990629	2
353	350	426	396	138840	2.2856	51.22	50.74	48.06	0	0			149.3	0.938305	0.990629	3
376	375	414	412	160230	4.4648	50.53	49.67	46.57	66977	2.2029	40.85	0.877174	636.06	0.921631	0.98298	1
377	375	391	397	123980	2.0919	50.53	49.67	46.57	0	0			100.57	0.921631	0.98298	2
378	375	45	20	737	2.2499	50.53	49.67	46.57	0	0			46.063	0.921631	0.98298	3
401	400	454	381	145640	2.4659	47.96	46.34	46.39	61843	2.3263	43.66	0.941151	547.89	0.967264	0.966222	1
402	400	397	386	123350	2.1382	47.96	46.34	46.39	0	0			145.8	0.967264	0.966222	2
403	400	416	380	132930	2.4549	47.96	46.34	46.39	0	0			151.77	0.967264	0.966222	3
451	450	380	12	4588,05,01	-1	45.91	45.52	44.51	52892	2.1835			4002	0.969506	0.991505	1
452	450	408	6	2829	-1	45.91	45.52	44.51	0	0			4648	0.969506	0.991505	2
453	450	378	14	3104,05,01	-1	45.91	45.52	44.51	0	0			4125	0.969506	0.991505	3
501	500	362	345	102310	2.2527	42.96	41.24	39.86	45178	2.532			152.3	0.92784	0.959963	1
502	500	110	20	2220	-1	42.96	41.24	39.86	0	0			413.85	0.92784	0.959963	2
503	500	351	341	98872	2.3124	42.96	41.24	39.86	0	0			255.54	0.92784	0.959963	3
551	550	332	345	91582	2.0983	40.47	39.5	37.97	37708	2.4329			154.71	0.938226	0.976032	1
552	550	352	338	88458	1.7579	40.47	39.5	37.97	0	0			163.03	0.938226	0.976032	2
553	550	196	22	4454	-1	40.47	39.5	37.97	0	0			1125.6	0.938226	0.976032	3
601	600	348	338	85141	1.6633	38.05	36.73	34.65	32224	2.6353			309.32	0.910644	0.965309	1
602	600	266	8	2430,05,01	-1	38.05	36.73	34.65	0	0			2014	0.910644	0.965309	2
603	600	243	9	1696.5	1.9383	38.05	36.73	34.65	0	0			1756.3	0.910644	0.965309	3

## Sheet: ch_p10q00
Alg:	chopping
Parameters:
p= 1,000	Gauss term
q= 0,000	Mean curvature term
CutVol= 0,0005
cycle= 100
a	b	c		n2		y1	y2	n3	V	r	roundness
[mm]	[mm]	[mm]	n_xy	n_xz	n_yz	c/a	b/a		[mm3]
35.46	30.27	25.75	25	25	25	0.72617	0.853638	10	221079	2.5	0.0970874
35.46	30.27	25.75	16.418	21.321	25	0.72617	0.853638	9.369	210972	3.524	0.136854
35.46	30.27	25.75	9.478	10.582	13.195	0.72617	0.853638	6.472	201404	6.825	0.265049
35.46	30.27	25.75	7.18	7.241	9.209	0.72617	0.853638	4.97	192274	8.25	0.320388
35.46	30.27	25.75	5.318	5.537	7.166	0.72617	0.853638	4.239	183568	9.78	0.379806
35.46	30.27	25.75	4.206	4.498	5.758	0.72617	0.853638	3.725	175224	12.383	0.480893
35.46	30.27	25.75	3.645	4.043	5.105	0.72617	0.853638	3.344	167272	13.25	0.514563
35.46	30.27	25.75	3.13	3.63	4.425	0.72617	0.853638	3.046	159677	15.485	0.601359
35.46	30.27	25.75	2.75	3.255	3.978	0.72617	0.853638	2.808	152448	16.94	0.657864
35.46	30.27	25.75	2.534	2.855	3.646	0.72617	0.853638	2.609	145542	17.96	0.697476
35.2	30.27	25.75	2.39	2.712	3.27	0.731534	0.859943	2.466	138942	19.15	0.743689
34.62	30.27	25.75	2.341	2.659	2.873	0.74379	0.87435	2.369	132634	19.95	0.774757
34.54	30.26	25.75	2.15	2.326	2.717	0.745512	0.876086	2.24	126600	20.35	0.790291
34.02	30.11	25.75	2.084	2.246	2.599	0.756908	0.885068	2.171	120874	21.28	0.826408
33.49	29.35	25.75	2.096	2.229	2.569	0.768886	0.876381	2.158	115395	21.52	0.835728
32.65	29.29	25.75	2.051	2.242	2.41	0.788668	0.89709	2.112	110146	21.87	0.84932
32.06	28.71	25.75	2.084	2.192	2.356	0.803182	0.895508	2.092	105156	21.9	0.850485
31.63	28.68	25.66	2.052	2.118	2.223	0.811255	0.906734	2.028	100385	21.957	0.85569
31.37	28.27	25.65	1.995	1.989	2.155	0.81766	0.901179	2	95846.6	21.95	0.85575
30.93	27.71	25.32	2.073	2.01	2.116	0.818623	0.895894	2	91513.5	21.95	0.866904
30.67	27.53	25.3	1.994	1.903	2.017	0.82491	0.89762	1.982	87373.4	21.953	0.867708
29.34	27.36	25	2.034	1.993	1.999	0.852079	0.932515	2	83419	22.27	0.8908
29.07	26.74	25	1.999	1.973	2.01	0.859993	0.919849	1.987	79645.4	22.3	0.892
28.65	26.65	24.7	1.99	1.896	1.98	0.862129	0.930192	1.954	76039.5	22.35	0.904858
28.28	25.9	24.7	2.014	1.845	1.933	0.873409	0.915842	1.945	72606.1	22.44	0.908502
27.99	25.71	24.24	1.958	1.847	1.909	0.866024	0.918542	2	69325.5	22.4	0.924092
27.48	25.29	24.24	1.963	1.775	1.864	0.882096	0.920306	1.905	66189.4	22.4	0.924092
26.72	25.14	24.07	1.921	1.798	1.84	0.900823	0.940868	1.895	63200.3	22.36	0.928957
25.87	25.01	23.5	1.969	1.919	1.858	0.908388	0.966757	1.924	60347	21.78	0.926809
25.78	24.48	22.99	1.886	1.928	1.92	0.891777	0.949573	1.924	57616.1	21.45	0.933014
25.4	23.55	22.92	1.954	15.611	1.989	0.902362	0.927165	2	55012.2	21.319	0.930148
25.25	23.24	22.59	1.914	1.836	1.993	0.894653	0.920396	1.92	52528.8		0
24.7	23.16	22.17	1.891	25	1.94	0.897571	0.937652	1.916	50153.4		0
23.72	22.9	22.1	1.96	1.911	1.906	0.931703	0.96543	1.933	47887.3		0
23.72	22.8	21.42	1.854	1.905	1.938	0.903035	0.961214	1.914	45727.2		0
23.36	22.68	20.9	1.795	1.922	1.964	0.894692	0.97089	1.911	43660.5		0
22.21	22.27	20.66	1.95	2.041	1.961	0.930212	1.0027	1.978	41685.7		0
21.61	21.83	20.28	1.993	2.1	1.981	0.938454	1.01018	2	39804.4		0
21.5	21.54	19.89	1.958	2.044	1.985	0.925116	1.00186	2	38001		0
21.07	21.32	19.65	1.963	2.09	1.956	0.932606	1.01187	1.994	36286.1		0
20.74	20.89	19.46	1.941	2.074	1.995	0.938284	1.00723	1.992	34644.3		0
20.63	20.54	19.33	1.918	2.003	2.026	0.936985	0.995637	1.958	33077.7		0
20.4	20.3	18.86	1.912	1.989	1.962	0.92451	0.995098	1.959	31580.9		0
19.77	20.07	18.71	1.952	2.04	1.928	0.946383	1.01517	1.968	30152.3		0
19.51	19.83	18.59	1.886	1.975	1.91	0.952845	1.0164	1.94	28792.8		0
19.15	19.41	18.37	1.908	1.989	1.903	0.959269	1.01358	2	27492		0
18.88	18.84	18.18	1.99	1.96	1.941	0.962924	0.997881	1.968	26253.2		0
18.16	18.66	17.98	2.021	2.027	1.935	0.990088	1.02753	1.996	25068.9		0

## Sheet: ch_p09q01
Alg:	chopping
Parameters:
p= 0,900	Gauss term
q= 0,100	Mean curvature term
CutVol= 0,0005
cycle= 100
a	b	c		n2		y1	y2	n3	V
[mm]	[mm]	[mm]	n_xy	n_xz	n_yz	c/a	b/a		[mm3]
35.46	30.27	25.75	25	25	25	0.72617	0.853638	12	221079
35.46	30.27	25.75	14.681	23.479	23.422	0.72617	0.853638	9.378	210988
35.46	30.27	25.75	8.82	11.91	11.826	0.72617	0.853638	6.472	201403
35.46	30.27	25.75	5.762	8.638	7.535	0.72617	0.853638	4.965	192218
35.46	30.27	25.75	4.889	7.048	6.315	0.72617	0.853638	4.234	183491
35.46	30.27	25.75	4.356	5.206	5.273	0.72617	0.853638	3.723	175176
35.46	30.27	25.75	3.67	4.339	4.687	0.72617	0.853638	3.342	167245
35.46	30.27	25.75	3.257	3.654	4.044	0.72617	0.853638	3.046	159660
35.46	30.27	25.75	2.861	3.245	3.711	0.72617	0.853638	2.807	152416
35.46	30.27	25.75	2.564	2.891	3.342	0.72617	0.853638	2.608	145511
35.24	30.27	25.75	2.452	2.74	2.922	0.730704	0.858967	2.461	138911
34.7	30.27	25.75	2.352	2.582	2.733	0.742075	0.872334	2.361	132619
33.71	30.27	25.75	2.311	2.593	2.603	0.763868	0.897953	2.309	126608
33.13	29.97	25.75	2.234	2.543	2.541	0.777241	0.904618	2.254	120863
32.95	29.89	25.75	2.066	2.401	2.42	0.781487	0.907132	2.154	115391
32.33	29.69	25.71	2.101	2.274	2.273	0.795237	0.918342	2.107	110160
31.68	29.36	25.71	2.121	2.192	2.219	0.811553	0.926768	2.072	105182
31.54	28.91	25.71	2.043	2.074	2.094	0.815155	0.916614	2.014	100429
31.23	28.64	25.71	2.006	2.051	1.986	0.823247	0.917067	2	95890.1
30.82	28.09	25.71	1.963	1.965	1.978	0.834199	0.911421	1.994	91554.6
29.82	27.79	25.56	2.038	2.032	1.89	0.857143	0.931925	2	87416.8
29.49	27.73	25.29	1.993	1.971	6.469	0.857579	0.940319	1.956	83465.2
28.92	26.99	24.8	2.047	1.978	1.934	0.857538	0.933264	1.996	79684.7
28.24	26.54	24.26	2.152	2.076	1.972	0.859065	0.939802	2	76083.9
27.97	26.39	24.21	2.02	1.964	1.921	0.86557	0.943511	1.97	72638.6
27.55	25.89	24.09	2.011	1.911	1.903	0.87441	0.939746	1.956	69349
27.33	25.51	24.04	1.978	1.851	1.868	0.879619	0.933407	1.915	66214.5
26.47	25.38	23.79	1.978	1.912	1.823	0.898753	0.958821	1.917	63214.7
26.03	25.09	22.97	1.989	2.017	2.623	0.882443	0.963888	2	60356.9
25.71	24.44	22.66	1.967	2.001	1.92	0.881369	0.950603	1.962	57629.8
24.99	24.44	22.4	1.981	1.967	1.844	0.896359	0.977991	2	55026.8
24.24	24.03	21.95	2.02	2.055	1.902	0.905528	0.991337	1.992	52542.9
24.05	23.73	21.1	2.022	2.05	2.036	0.877339	0.986694	2	50175.2
23.35	23.28	21.03	2.098	2.06	1.997	0.900642	0.997002	2	47903.9
23.02	22.76	20.73	2.134	2.101	1.954	0.900521	0.988705	2	45741
22.9	22.69	20.54	2.014	2.059	1.896	0.896943	0.99083	1.984	43673.3
22.3	22.54	20.41	1.939	2.09	1.834	0.915247	1.01076	1.971	41700.2
22.08	22.1	20.26	1.985	2.037	1.835	0.917572	1.00091	2	39818.6
21.86	21.63	20	2.006	2.011	1.877	0.914913	0.989478	2	38016.4
21.54	21.43	19.97	1.946	1.945	1.802	0.927112	0.994893	1.909	36295.2
21.13	21.15	19.46	1.931	1.983	2	0.920965	1.00095	1.932	34655
21.01	20.51	19.19	1.93	1.96	1.927	0.913375	0.976202	1.94	33089.5
20.77	20.38	18.96	1.897	1.886	7.125	0.912855	0.981223	1.909	31593.2
20.44	19.8	18.68	1.934	1.869	21.197	0.913894	0.968689	1.933	30167.3
20.25	19.59	18.68	1.874	1.835	1.838	0.922469	0.967407	1.885	28801.3
19.86	19.37	18.63	1.865	1.838	1.757	0.938066	0.975327	1.863	27499.8
19.4	18.8	18.26	1.917	1.917	1.848	0.941237	0.969072	1.911	26255.6
19.09	18.33	17.72	1.942	1.915	1.963	0.928235	0.960189	1.959	25068.3

## Sheet: ch_p07q03
Alg:	chopping
Parameters:
p= 0,700	Gauss term
q= 0,300	Mean curvature term
CutVol= 0,0005
cycle= 100
a	b	c		n2		y1	y2	n3	V
[mm]	[mm]	[mm]	n_xy	n_xz	n_yz	c/a	b/a		[mm3]
35.46	30.27	25.75	25	25	25	0.72617	0.853638	10	221079
35.46	30.27	25.75	17.91	16.386	19.277	0.72617	0.853638	9.385	211002
35.46	30.27	25.75	8.694	10.77	10.938	0.72617	0.853638	6.466	201372
35.46	30.27	25.75	6.841	6.497	7.219	0.72617	0.853638	4.966	192232
35.46	30.27	25.75	4.745	5.614	6.112	0.72617	0.853638	4.235	183515
35.46	30.27	25.75	4.185	4.74	5.321	0.72617	0.853638	3.721	175146
35.46	30.27	25.75	3.749	4.069	4.843	0.72617	0.853638	3.34	167163
35.46	30.27	25.75	3.269	3.513	4.151	0.72617	0.853638	3.042	159552
35.46	30.27	25.75	3.016	3.037	3.702	0.72617	0.853638	2.804	152321
35.21	30.27	25.75	2.785	2.81	3.265	0.731326	0.859699	2.633	145400
35.05	30.22	25.75	2.486	2.622	3.011	0.734665	0.862197	2.483	138808
34.73	30.16	25.75	2.298	2.519	2.723	0.741434	0.868413	2.367	132516
34.47	30.05	25.75	2.23	2.315	2.536	0.747026	0.871773	2.263	126502
34.21	29.91	25.75	2.127	2.211	2.418	0.752704	0.874306	2.172	120756
33.59	29.51	25.6	2.082	2.271	2.418	0.762132	0.878535	2.15	115283
32.95	29.08	25.37	2.081	2.225	2.411	0.769954	0.882549	2.141	110054
32.49	28.98	25.37	2.093	2.128	2.257	0.780856	0.891967	2.073	105073
31.98	28.79	25.25	2.036	2.128	2.199	0.789556	0.90025	2.029	100311
31.53	28.62	25.19	1.971	2.031	2.091	0.798922	0.907707	2	95770.7
31.39	28.43	25.12	1.9	1.901	2.011	0.800255	0.905702	1.978	91436.2
30.46	28.42	24.73	24.237	2.024	1.97	0.811884	0.933027	1.977	87293.2
29.95	28.1	24.36	1.836	2.044	1.958	0.813356	0.93823	1.97	83348.2
29.06	27.19	24.33	1.9	2.003	2.004	0.837233	0.93565	2	79573.4
28.09	26.71	23.71	1.949	2.159	2.109	0.844073	0.950872	2.008	75980.7
28.03	25.84	23.48	1.983	2.096	2.14	0.837674	0.921869	2.005	72542.5
27.81	25.56	23.27	1.948	2.001	2.085	0.836749	0.919094	2	69262.9
27.58	25	23.03	1.941	1.935	2.145	0.835025	0.906454	2	66130
27.02	24.46	22.98	1.98	1.925	2.194	0.850481	0.905255	2	63143.8
26.68	24.24	22.91	1.899	5.789	2.117	0.858696	0.908546	1.973	60289
26.46	24.07	22.68	1.844	1.835	2.067	0.857143	0.909675	1.931	57561.2
25.67	23.99	22.47	1.868	1.89	1.967	0.875341	0.934554	1.925	54951.7
25.48	23.97	22.12	1.809	1.821	1.872	0.868132	0.940738	1.883	52471.4
24.98	23.46	21.3	1.862	1.933	2.01	0.852682	0.939151	1.945	50101.2
24.4	22.78	21.28	1.92	1.862	1.991	0.872131	0.933607	1.959	47837.8
23.99	22.18	20.8	1.994	1.926	2.116	0.867028	0.924552	2	45669.4
23.22	21.94	20.68	2.033	1.933	2.032	0.890612	0.944875	2	43604.3
22.98	21.86	20.37	1.925	1.928	1.973	0.886423	0.951262	1.972	41629.3
22.68	21.56	20.23	1.905	1.876	1.945	0.891975	0.950617	1.948	39743.9
21.97	21.04	20.03	2.021	1.932	1.983	0.911698	0.95767	1.987	37947.9
21.37	20.9	19.38	2.043	2.076	2.004	0.906879	0.978007	2	36231.6
21.24	20.31	19.17	2.049	2.015	2.025	0.902542	0.956215	2	34593.4
21.07	20.09	18.66	1.984	2.043	2.062	0.885619	0.953488	2	33031.4
20.46	19.38	18.34	2.123	2.155	2.183	0.896383	0.947214	2.041	31536.3
20.12	19.2	18.17	2.127	2.119	2.133	0.903082	0.954274	2.017	30110.4
19.76	18.98	17.92	2.075	2.102	2.145	0.906883	0.960526	2.012	28747.3
19.47	18.92	17.9	2.028	2.085	2.044	0.919363	0.971751	2	27447.7
19.05	18.83	17.73	2.048	2.068	1.954	0.930709	0.988451	1.998	26208.1
18.77	18.18	17.42	2.087	2.048	2.039	0.928077	0.968567	2	25024.4

## Sheet: ls_p10q00
Alg:	level-set
Parameters:
p= 1,000	Gauss term
q= 0,000	Mean curvature term
dens=41
Vlossratio= 0.15
a	b	c		n2		y1	y2	n3	V	r	roundness
[mm]	[mm]	[mm]	n_xy	n_xz	n_yz	c/a	b/a		[mm3]
35.505	30.507	24.527	14.302	13.718	13.262	0.6908	0.85923	10	207410	2.5	0.101928
35.5	30.519	24.546	11.879	12.157	12.193	0.69142	0.85969	8.6293	201480	4.89	0.199218
35.498	30.519	24.545	9.0268	9.8023	10.586	0.69146	0.85974	6.8339	195820	6.232	0.253901
35.489	30.513	24.536	5.913	6.6513	7.5954	0.69137	0.85978	5.0412	184490	8.6	0.350505
35.476	30.486	24.517	4.0266	4.6757	5.2663	0.6911	0.85936	3.8286	169100	11.558	0.471428
35.473	30.488	24.513	3.298	3.7244	4.3262	0.69102	0.85945	3.2608	157720	13.764	0.561498
34.732	30.474	24.493	2.3324	2.6726	2.8998	0.70518	0.87741	2.4837	130830	18.15	0.741028
32.567	29.636	24.483	2.0802	2.2772	2.3198	0.75178	0.91001	2.1779	107250	20.134	0.822367
30.809	28.403	24.321	2.0344	2.1223	2.1354	0.78942	0.92192	2.0812	92660	20.574	0.845936
25.039	23.931	21.799	2.0039	2.0087	2.0177	0.87061	0.95576	2.0073	54915	20.781	0.953301
16.47	16.25	15.758	2.0024	2.0108	2.012	0.95682	0.98668	2.0061	17720		0

## Sheet: ls_p09q01
Alg:	level-set
Parameters:
p= 0.82	Gauss term
q= 0.18	Mean curvature term
dens=41
Vlossratio= 0.1
a	b	c		n2		y1	y2	n3	V
[mm]	[mm]	[mm]	n_xy	n_xz	n_yz	c/a	b/a		[mm3]
35.508	30.508	24.528	15.647	14.847	14.183	0.69078	0.85918	10	208080
35.479	30.493	24.516	6.52	6.6652	6.5239	0.691	0.85947	5.3522	186760
35.469	30.474	24.492	3.9717	4.1822	4.3287	0.6905	0.85917	3.643	165530
35.312	30.439	24.483	2.8431	3.0605	3.2172	0.69333	0.86198	2.8298	144910
34.343	30.128	24.456	2.3468	2.5334	2.5875	0.71209	0.87725	2.4066	124720
32.639	29.149	24.243	2.1422	2.254	2.2627	0.74277	0.8931	2.1888	105140
30.419	27.619	23.584	2.056	2.1157	2.1098	0.7753	0.90794	2.081	86257
27.785	25.631	22.459	2.0201	2.0497	2.043	0.8083	0.92248	2.0322	68054
24.761	23.215	20.872	2.0053	2.0217	2.0183	0.84295	0.9376	2.012	50557
21.228	20.262	18.723	2.0035	2.0141	2.0083	0.88199	0.9545	2.0058	33833
16.828	16.359	15.599	2.0024	2.0105	2.0057	0.927	0.97215	2.0042	18023

[truncated: 2 more sheets: ls_p07q03, Munka1]
